# Supplementary material for: Cell-free eukaryotic systems for the production, engineering, and modification of scFv antibody fragments
Source: PubMed Central journal article supplement (PMC4374706; doi:10.1002/elsc.201400036), 2014-07-15
Supplement: elsc0014-0387-sd1.pdf [file elsc0014-0387-sd1.pdf]

Supporting information to

## Cell-free eukaryotic systems for the production, engineering and modification of scFv antibody fragments

Table S1. Overview of (A) primers and (B) primer sequences used in this study.

| <b>A</b>    |                     |                     |                |            |       |            |
|-------------|---------------------|---------------------|----------------|------------|-------|------------|
| Construct   | PCR step 1          |                     |                | PCR step 2 |       |            |
|             | Forward             |                     | Reverse        | Forward    |       | Reverse    |
|             | w/o                 | w                   |                | w/o        | w     |            |
| SH527-IIA4  | X-osp-SH527-IIA4-F  | X-Mel-SH527-IIA4-F  | X-pHAL14-myc-R | N-0        | N-Mel | C-pHAL14-R |
| SH527-IIC10 | X-osp-SH527-IIC10-F | X-Mel-SH527-IIC10-F |                |            |       |            |
| SH855-C11   | X-osp-SH527-IIC10-F | X-Mel-SH527-IIC10-F |                |            |       |            |

  

| <b>B</b>            |                                                                                                                                                                                                                                          |
|---------------------|------------------------------------------------------------------------------------------------------------------------------------------------------------------------------------------------------------------------------------------|
| Primer              | Nucleotide sequence 5' → 3'                                                                                                                                                                                                              |
| C-pHAL14-amb-R      | Biotin-ATG ATA TCA CCG GTG AAT TCG GAT CCA AAA AAC CCC TCA AGA CCC GTT TAG AGG CCC CAA GGG GTA CAG ATC TTG GTT AGT TAG TTA TTA ATT CAG ATC CTC TTC TGA GAT GAG TTT TTG TTC CT                                                            |
| C-pHAL14-R          | Biotin-ATG ATA TCA CCG GTG AAT TCG GAT C CA AAA AAC CCC TCA AGA CCC GTT TAG AGG CCC CAA GGG GTA CAG ATC TTG GTT AGT TAG TTA TTA                                                                                                          |
| N-0                 | Biotin-ATG ATA TCT CGA GCG GCC GCT AGC TAA TAC GAC TCA CTA TAG GGA GAC CAC AAC GGT TTC CCT CTA GAA ATA ATT TTG TTT AAC TTT AAG AAG GAG ATA AAC AAT G                                                                                     |
| N-Mel               | Biotin-ATG ATA TCT CGA GCG GCC GCT AGC TAA TAC GAC TCA CTA TAG GGA GAC CAC AAC GGT TTC CCT CTA GAA ATA ATT TTG TTT AAC TTT AAG AAG GAG ATA AAC AAT GAA ATT CTT AGT CAA CGT TGC CCT TGT TTT TAT GGT CGT ATA CAT TTC TTA CAT CTA TGC GGA C |
| X-mel-SH527-IIA4-F  | TAC ATT TCT TAC ATC TAT GCG GAC CAG GTG CAG CTG CAG GAG T                                                                                                                                                                                |
| X-mel-SH527-IIC10-F | TAC ATT TCT TAC ATC TAT GCG GAC CAG GTC CAG CTG GTG CAG TCT                                                                                                                                                                              |
| X-osp-SH527-IIA4-F  | TAA GAA GGA GAT AAA CAA TGC AGG TGC AGC TGC AGG AGT                                                                                                                                                                                      |
| X-osp-SH527-IIC10-F | TAA GAA GGA GAT AAA CAA TGC AGG TCC AGC TGG TGC AGT CT                                                                                                                                                                                   |
| X-pHAL14-amb-myc-R  | TCT GAG ATG AGT TTT TGT TCC TAG GCC CCG TGA TGG TGA TGA T                                                                                                                                                                                |
| X-pHAL14-myc-R      | TCT TGG TTA GTT AGT TAT TAA TTC AGA TCC TCT TCT GAG AT                                                                                                                                                                                   |

w = Generation of linear DNA templates with melittin signal sequence. w/o = Generation of templates without signal sequence.
